# Supplementary material for: β-barrel proteins dictate the effect of core oligosaccharide composition on outer membrane mechanics
Source: PubMed Central journal article supplement — bioRxiv. 2024 Sep 3:2024.09.02.610904. Preprint. [Version 1] doi: 10.1101/2024.09.02.610904 (PMC11398377; doi:10.1101/2024.09.02.610904), 2024-09-03
Supplement: NIHPP2024.09.02.610904v1-supplement-1.pdf [file NIHPP2024.09.02.610904v1-supplement-1.pdf]

**Supplemental Information:  $\beta$ -barrel proteins determine the effect of core oligosaccharide composition on outer membrane mechanics**  
bioRxiv preprint doi: <https://doi.org/10.1101/2024.09.02.610904>; this version posted September 3, 2024. The copyright holder for this preprint (which was not certified by peer review) is the author/funder, who has granted bioRxiv a license to display the preprint in perpetuity. It is made available under a [CC-BY-NC-ND 4.0 International license](#).

Dylan Fitzmaurice<sup>1</sup>, Anthony Amador<sup>1</sup>, Tahj Starr<sup>1</sup>, Glen Hocky<sup>2</sup>, Enrique R. Rojas<sup>1\*</sup>

<sup>1</sup>Department of Biology, New York University, New York, New York, 10003, USA

<sup>2</sup>Department of Chemistry and Simons Center for Computational Physical Chemistry, New York University, New York, New York, 10003, USA

\*: Correspondence: [rojas@nyu.edu](mailto:rojas@nyu.edu)

**Running Title:** Molecular basis of bacterial envelope mechanics

## Supplemental Figures

bioRxiv preprint doi: <https://doi.org/10.1101/2024.09.02.610904>; this version posted September 3, 2024. The copyright holder for this preprint (which was not certified by peer review) is the author/funder, who has granted bioRxiv a license to display the preprint in perpetuity. It is made available under a [CC-BY-NC-ND 4.0 International license](#).

### Plasmolysis-lysis Assay

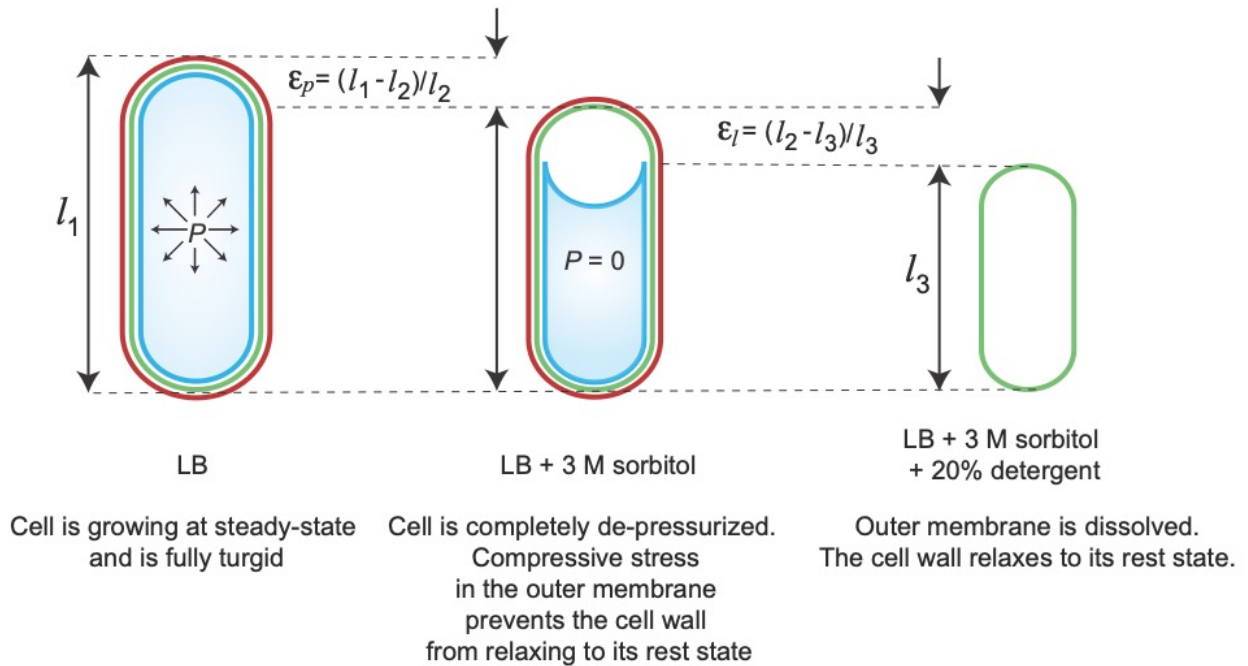

**Figure S1. Plasmolysis-lysis assay used to measure the ratio between the stiffness of the cell wall and the outer membrane.** Model of a fully turgid cell at a steady-state length ( $l_1$ ). The cell is de-pressurized by a large 3M hypo-osmotic shock resulting in a plasmolysed cell whose length contracts ( $l_2$ ). The strain resulting from this shock is calculated by:  $\epsilon_p = \frac{l_1 - l_2}{l_2}$ . The cell is then treated with 20% detergent which dissolves the outer membrane allowing the cell wall to relax to its rest state ( $l_3$ ). The strain resulting from this shock is calculated by:  $\epsilon_l = \frac{l_2 - l_3}{l_3}$ . By treating the outer membrane and cell wall as parallel linear springs, relative stiffness is calculated by:  $\frac{k_{om}}{k_{cw}} = \frac{\epsilon_l}{\epsilon_p(\epsilon_l + 1)}$ .

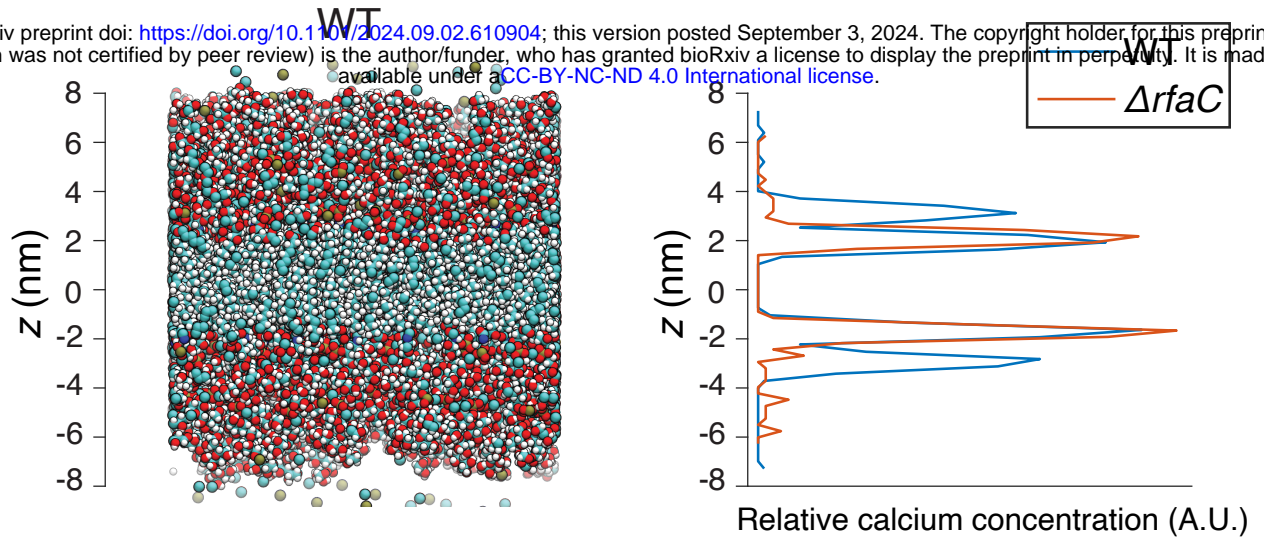

**Figure S2. Calcium distribution reflects the phosphate distribution in simulated lipopolysaccharide bilayers.** A) Simulated wild-type lipopolysaccharide bilayer. B) Calcium distribution across the thickness of the bilayer.

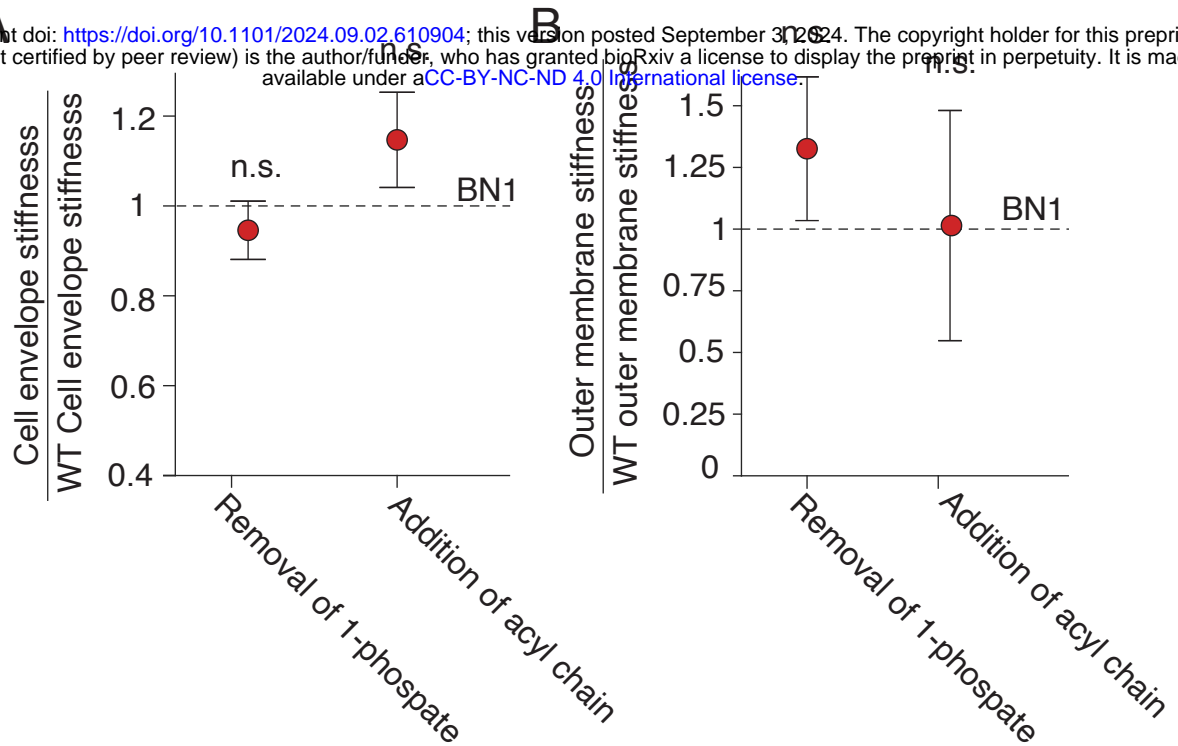

**Figure S3. Modifications to lipid A have weak effects on cell envelope stiffness.** A) Cell envelope stiffness of modified lipid A strains, normalized by wild-type (BN1) cell-envelope stiffness; n = 48, 54, 64, for BN1pE (removal of 1-phosphate), BN1pP (addition of acyl chain), and BN1 wild-type cells. B). Outer membrane stiffness of normalized by wild-type (BN1) cell-envelope stiffness; n = 45, 51, 87, for BN1pE, BN1pP, and BN1 wild-type cells.

**Table S1. Strains used in this study.**

| Strain | Genotype                                                                                                               | Relevant features                        | Source/Reference                           |
|--------|------------------------------------------------------------------------------------------------------------------------|------------------------------------------|--------------------------------------------|
| DF065  | F-lambda- <i>rph-1</i>                                                                                                 | MG1655, wild type                        | <i>E. coli</i> Genetic Stock center (Yale) |
| DF153  | DF065, $\Delta rfaC::kan$                                                                                              | MG1655, <i>rfaC</i> deletion, KanR       |                                            |
| DF154  | DF065, $\Delta rfaF::kan$                                                                                              | MG1655, <i>rfaF</i> deletion, KanR       |                                            |
| DF155  | DF065, $\Delta rfaG::kan$                                                                                              | MG1655, <i>rfaG</i> deletion, KanR       |                                            |
| DF156  | DF065, $\Delta rfaJ::kan$                                                                                              | MG1655, <i>rfaJ</i> deletion, KanR       |                                            |
| DF005  | $\Delta(araD-araB)567$<br>$\Delta lacZ4787(::rrnB-3)$<br>$\lambda$ - <i>rph-1</i><br>$\Delta(rhaD-rhaB)568$<br>hsdR514 | BW25113, wild type                       | <i>E. coli</i> Genetic Stock center (Yale) |
| DF032  | DF005, $\Delta rfaC::kan$                                                                                              | BW25113, <i>rfaC</i> deletion, KanR      | <i>E. coli</i> Genetic Stock center (Yale) |
| DF152  | DF005, $\Delta rfaF::kan$                                                                                              | BW25113, <i>rfaF</i> deletion, KanR      | <i>E. coli</i> Genetic Stock center (Yale) |
| DF041  | DF005, $\Delta rfaG::kan$                                                                                              | BW25113, <i>rfaG</i> deletion, KanR      | <i>E. coli</i> Genetic Stock center (Yale) |
| DF036  | DF005, $\Delta rfaJ::kan$                                                                                              | BW25113, <i>rfaJ</i> deletion, KanR      | <i>E. coli</i> Genetic Stock center (Yale) |
| DF053  | DF065, $\Delta ompA::kan$                                                                                              | MG1655, <i>ompA</i> deletion, KanR       |                                            |
| DF104  | DF065, $\Delta lpp::kan$                                                                                               | MG1655, <i>lpp</i> deletion, KanR        |                                            |
| DF103  | DF065, $\Delta pal::kan$                                                                                               | MG1655, <i>pal</i> deletion, KanR        |                                            |
| DF106  | DF065, <i>ompA</i> 1-192 :: <i>kan</i>                                                                                 | MG1655, <i>ompA</i> 1-192 deletion, KanR |                                            |
| DF049  | DF005, $\Delta ompA::kan$                                                                                              | BW25113, <i>ompA</i> deletion, KanR      | <i>E. coli</i> Genetic Stock center (Yale) |

|       |                                                                                                                                                                    |                                                              |                                               |
|-------|--------------------------------------------------------------------------------------------------------------------------------------------------------------------|--------------------------------------------------------------|-----------------------------------------------|
| DF102 | DF005, $\Delta lpp::kan$                                                                                                                                           | BW25113, <i>lpp</i> deletion, KanR                           | <i>E. coli</i> Genetic Stock center<br>(Yale) |
| DF101 | DF005, $\Delta pal::kan$                                                                                                                                           | BW25113, <i>pal</i> deletion, KanR                           | <i>E. coli</i> Genetic Stock center<br>(Yale) |
| DF110 | DF005, <i>ompA</i> 1-192 :: <i>kan</i>                                                                                                                             | BW25113, <i>ompA</i> 1-192 deletion, KanR                    |                                               |
| DF090 | F-<br><i>araD139</i><br>$\Delta(\arg F-lac)U169$<br><i>rpsL150</i><br><i>relA1</i><br><i>thi</i><br><i>fib5301</i><br><i>deoC1</i><br><i>ptsF25</i><br><i>rbsR</i> | MC4100, wild type                                            | Silhavy et al. 1984                           |
| DF043 | DF090,<br>$\Delta ompA::kan$                                                                                                                                       | MC4100, <i>ompA</i> deletion, KanR                           |                                               |
| DF006 | W3110, $\Delta ptA$ ,<br>$\Delta lpxT$ , $\Delta pagP$                                                                                                             | BN1                                                          | Needham et al. 2013                           |
| DF008 | BN1, pQLinkN-<br><i>lpxE</i>                                                                                                                                       | <i>BN1pE</i> , AmpR                                          | Needham et al. 2013                           |
| DF109 | BN1, pQLinkN-<br><i>pagL</i>                                                                                                                                       | <i>BN1pL</i> , AmpR                                          | Needham et al. 2013                           |
| DF007 | BN1, pQLinkN-<br><i>pagP</i>                                                                                                                                       | <i>BN1pP</i> , AmpR                                          | Needham et al. 2013                           |
| DF157 | DF065, $\Delta ompA$<br><> <i>frt</i><br>$\Delta rfaC::kan$                                                                                                        | MG1655, <i>ompA</i> and <i>rfaC</i><br>double deletion, KanR |                                               |
| DF158 | DF065, $\Delta ompA$<br><> <i>frt</i><br>$\Delta rfaF::kan$                                                                                                        | MG1655, <i>ompA</i> and <i>rfaF</i><br>double deletion, KanR |                                               |
| DF159 | DF065, $\Delta ompA$<br><> <i>frt</i><br>$\Delta rfaG::kan$                                                                                                        | MG1655, <i>ompA</i> and <i>rfaG</i><br>double deletion, KanR |                                               |
| DF160 | DF065, $\Delta ompA$<br><> <i>frt</i><br>$\Delta rfaJ::kan$                                                                                                        | MG1655, <i>ompA</i> and <i>rfaJ</i><br>double deletion, KanR |                                               |

**Table S2. Primers used in this study.**

| Name  | Sequence                                                            | Primer type | Description                                                              |
|-------|---------------------------------------------------------------------|-------------|--------------------------------------------------------------------------|
| TS023 | ATTCCGGGGATCCGTCGACC                                                | FP          | P1 - Kan FW                                                              |
| TS024 | TGTAGGCTGGAGCTGCTTCG                                                | RP          | P2 - Kan RV                                                              |
| TS025 | CAGTCATAGCCGAATAGCCT                                                | RP          | k1 - middle of kan cassette                                              |
| TS026 | CGGTGCCCTGAATGAACTGC                                                | FP          | k2 - middle of kan cassette                                              |
| TS027 | ATTGGTTTTTGCCCGGGT                                                  | FP          | rfaC FW                                                                  |
| TS028 | AGTAGCACGAAATGGCGAATTATCTAC                                         | RP          | rfaC RV                                                                  |
| TS029 | AATATGTTCTGTCAAATCCTGCC                                             | FP          | rfaF FW                                                                  |
| TS030 | GTCATAGTTCTCTGCTTGTAGCGC                                            | RP          | rfaF RV                                                                  |
| TS031 | ACAGCGCGTCAGATATTTAAG                                               | FP          | rfaG FW                                                                  |
| TS032 | TATCAACGCCAACATCACTCAGG                                             | RP          | rfaG RV                                                                  |
| TS033 | CAGTTTTCTGCACGAGCTA                                                 | FP          | rfaJ FW                                                                  |
| TS034 | CTCAAAAAGCGTTCGTAATAATCACC                                          | RP          | rfaJ RV                                                                  |
| AA001 | CGACCTGGACATCTACTC                                                  | FP          | ompA 1-192 FW                                                            |
| AA002 | GTATAGGAACTTCAGAGCGC                                                | RP          | ompA 1-192 RV                                                            |
| AA003 | TAAAGGTATCAAAGACGTTGTA<br>ACTCAGCCGCAGGCTTAAATTCCGG<br>GGATCCGTCGAC | FP          | homology to ompA 1-192 with stop codon, and homology to the Kan cassette |
| AA004 | GAAGCAGCTCCAGCCTACACGTCAGTTATTCCTTACCCAGCAATGCC<br>TGCAGATCCTGC     | RP          | homology to the Kan cassette                                             |
